# Supplementary material for: Long-Term Efficacy and Safety of Recombinant Human Growth Hormone in Children Born Small for Gestational Age
Source: PubMed Central journal article supplement — Horm Metab Res. 2023 Sep 7;55(9):599–609. doi: 10.1055/a-2136-8654 (PMC10484638; doi:10.1055/a-2136-8654), 2023-09-07
Supplement: 10-1055-a-2136-8654-2023-01-0026.pdf [file 10-1055-a-2136-8654-2023-01-0026.pdf]

1 **SUPPLEMENTARY MATERIAL**

2 **Supplementary Methods**

3 **Primary endpoint**

4 Height standard deviation score (HT-SDS) = (actual height – average height for children of the same sex  
5 and age) ÷ (standard deviation of the heights for children of the same sex and age [1])

6 **Secondary endpoints**

7 1) Height at the end of treatment

8 2) Height velocity (cm/year) = [12 × (height at end of treatment – height at start of treatment)] ÷ time to  
9 complete treatment (months)

10 3) Bone maturation = (Bone age at end of treatment – bone age at start of treatment) ÷ 2

11 4) Insulin-like growth factor 1 (IGF-1)/IGF binding protein-3 (IGFBP-3) molar ratio = [IGF-1(ng/ml)/7.6]/  
12 [IGFBP-3(ng/ml)/25.75]

13 5) Prevalence of overweight and/or obesity

14 The diagnosis of overweight in children is defined as body mass index (BMI) ≥ 85% and < 95% of the  
15 reference value for children of the same sex and age; diagnosis of childhood obesity is defined as BMI ≥  
16 95% reference value for children of the same sex and age.

17 **Supplementary Figures**

18 **Fig. 1S**  $\Delta$ HT-SDS among those who achieved final adult height for **a:** males and **b:** females.  $\Delta$ : change in;  
19 HT-SDS: height SD score.

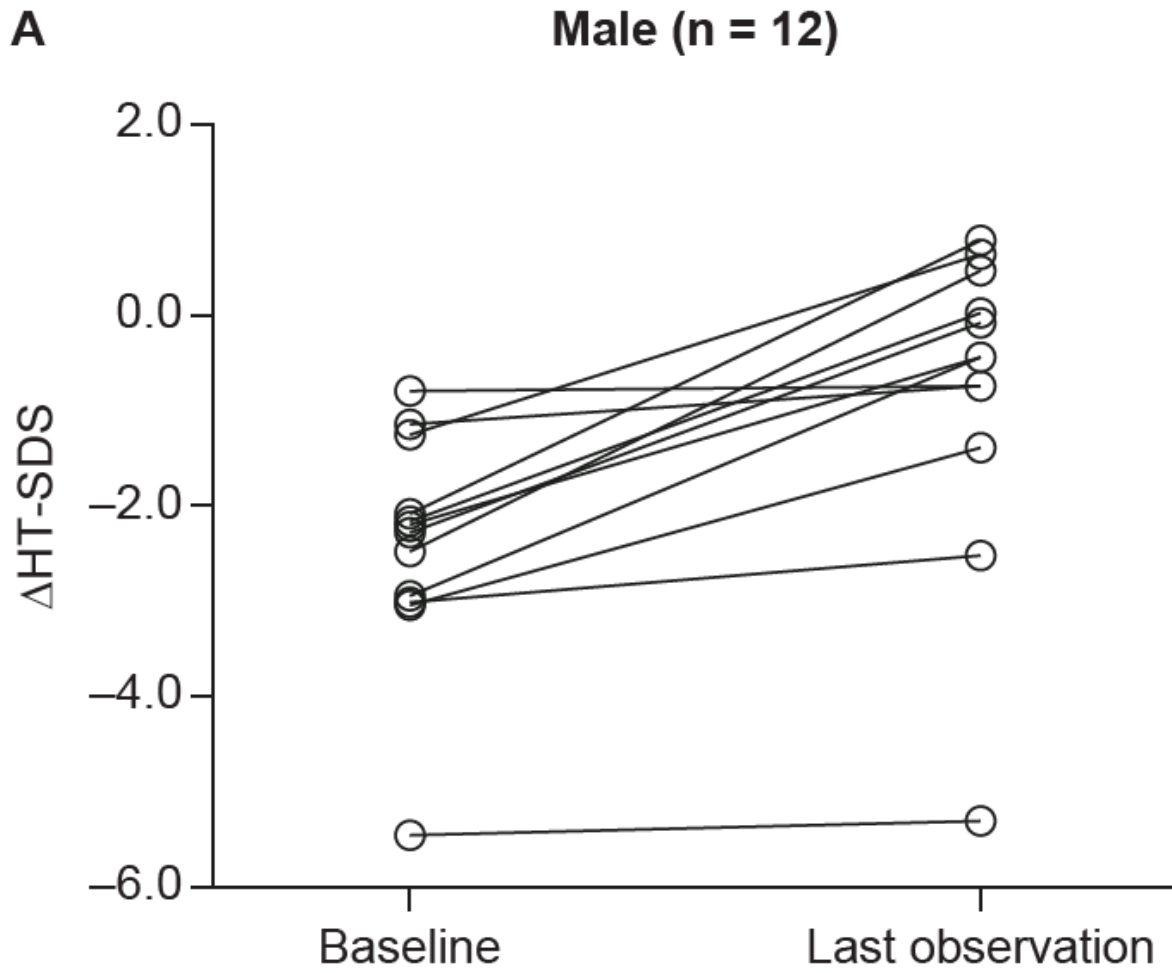

20

**B**

**Female (n = 18)**

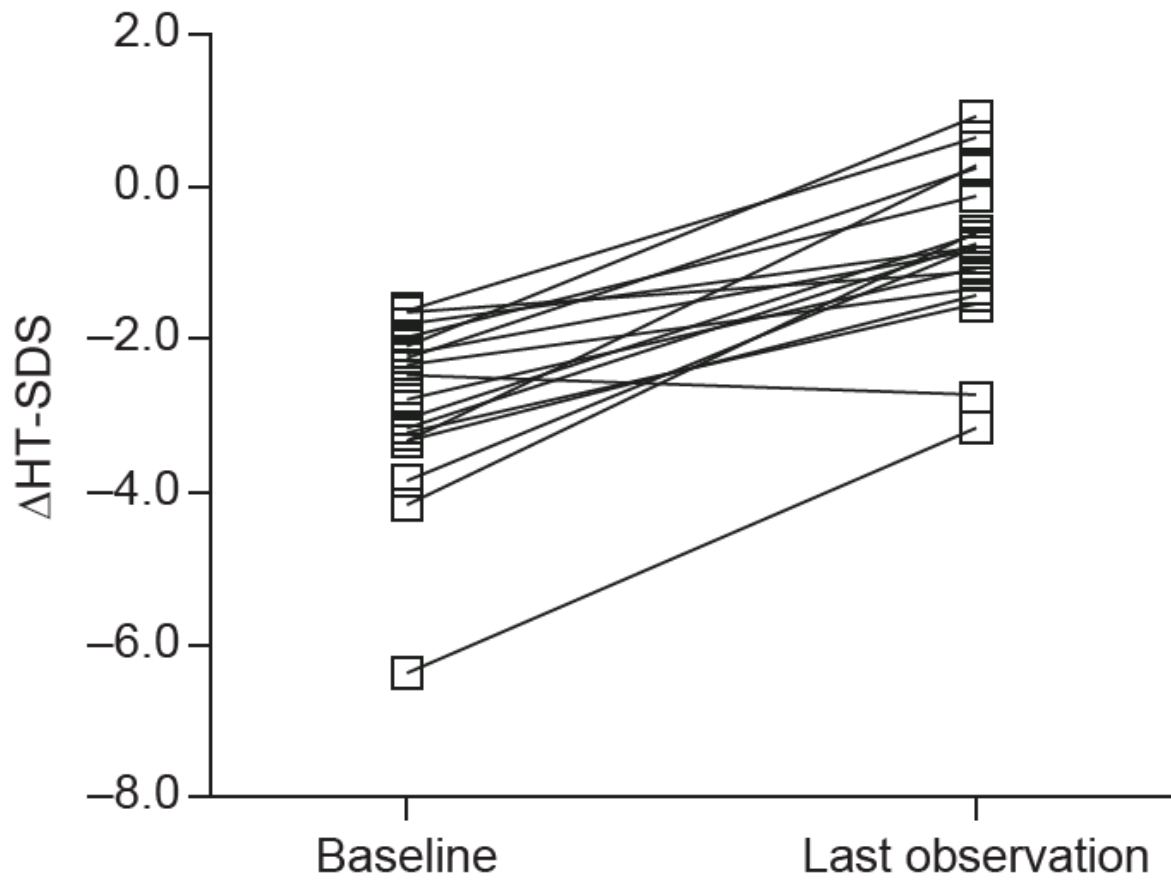

22 **Fig. 2S** Long-term effect of GH treatment on BMI SDS. BMI SDS: body mass index SD score; GH,  
23 growth hormone.

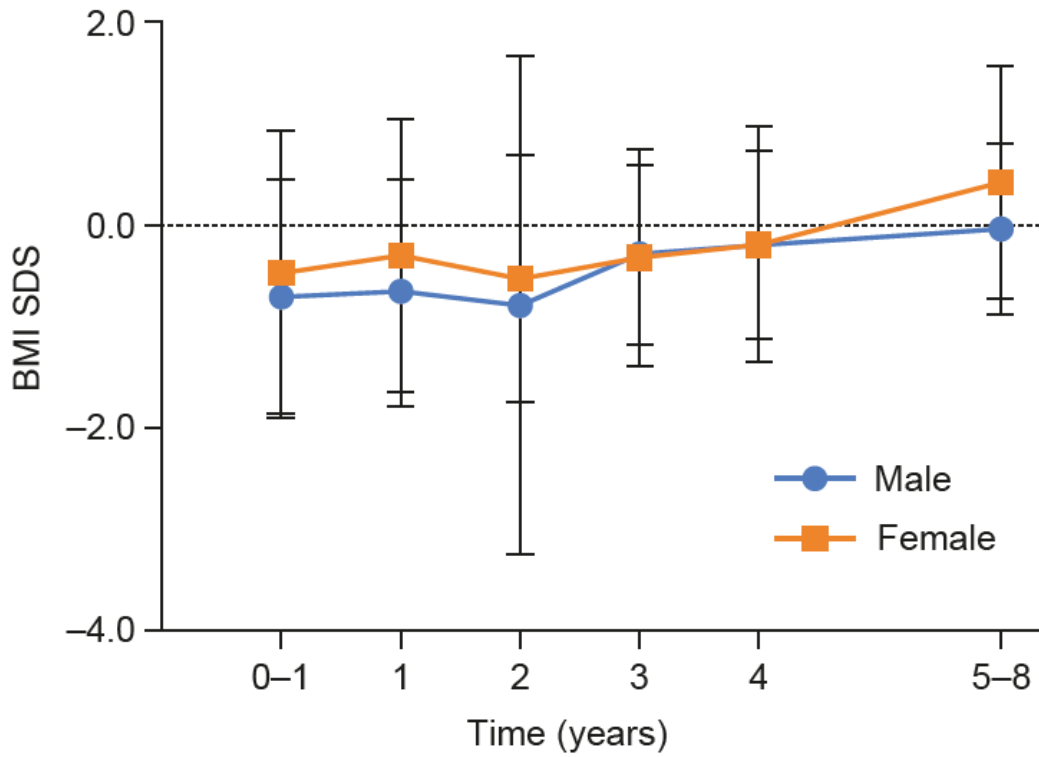

24

25 **Fig. 3S** Long-term effect of GH treatment on **a:** FPG, **b:** 2hPBG, **c:** HbA1c, and **d:** FINS. 2hPBG: 2-hour  
 26 post-prandial blood glucose; FINS: fasting insulin; FPG: fasting plasma glucose; GH, growth hormone;  
 27 HbA1c: glycosylated hemoglobin 1c.

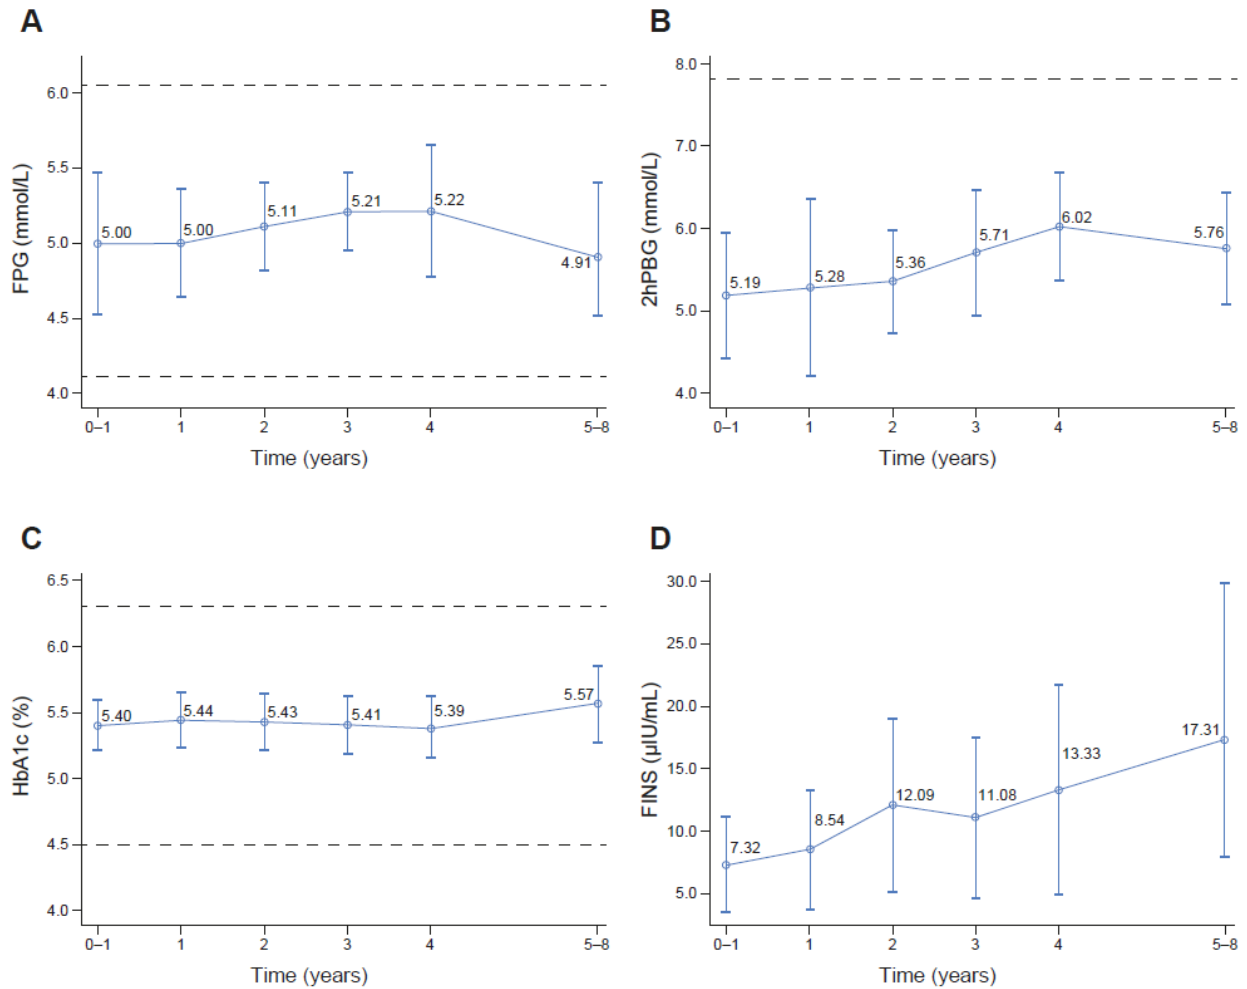

28

29 **Fig. 4S** Long-term effect of GH treatment on **a:** triiodothyronine, **b:** thyroxine, and **c:** thyroid stimulating  
30 hormone. GH: growth hormone; TSH: thyroid stimulating hormone.

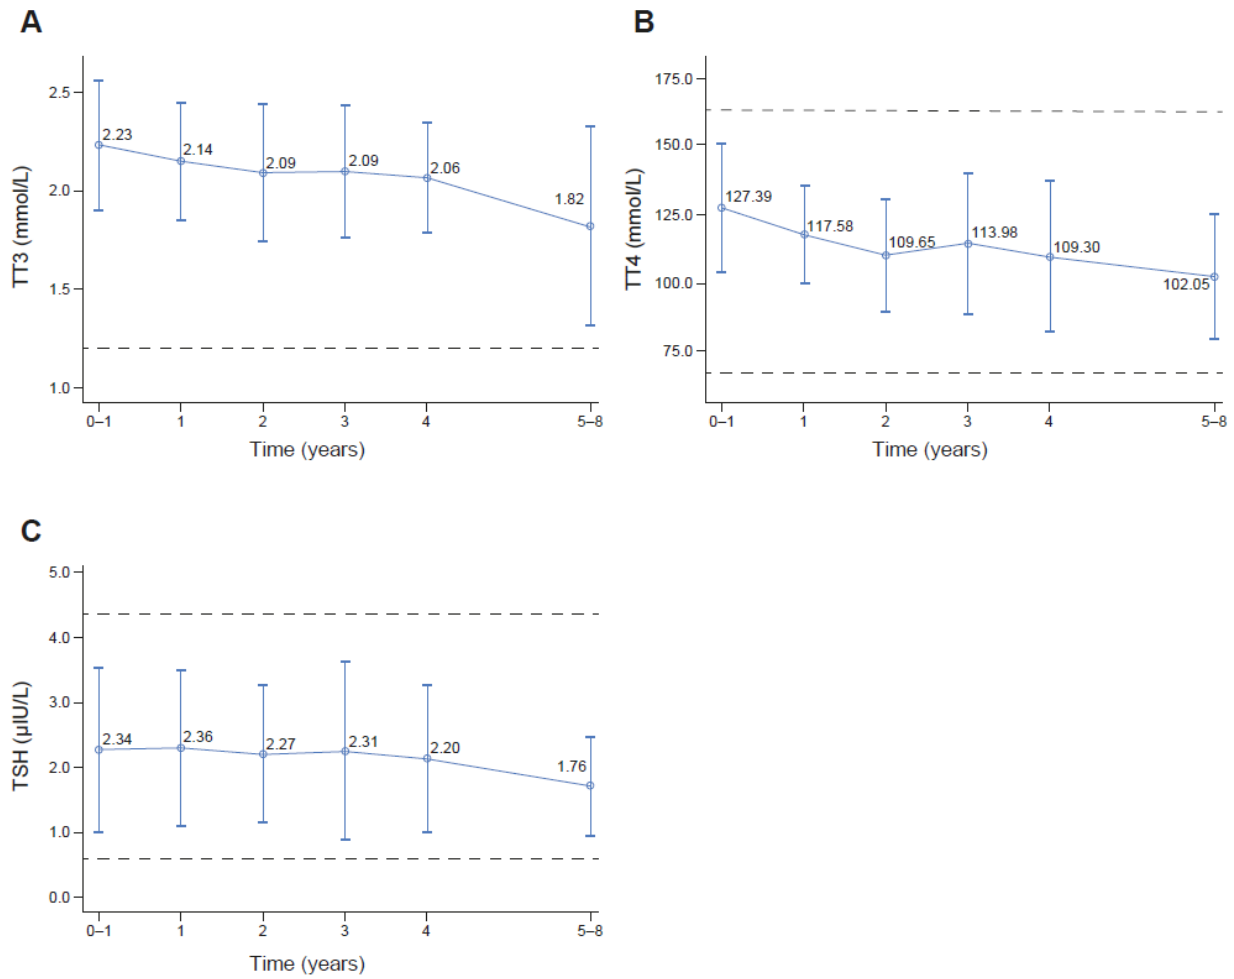

31

32

33 References

- 34 1. Li H, Ji CY, Zong XN et al. [Height and weight standardized growth charts for Chinese children  
35 and adolescents aged 0 to 18 years]. *Zhonghua Er Ke Za Zhi* 2009; 47: 487-492

36
